# Supplementary material for: Effect of Irrigation Management and Water Quality on Soil and Sorghum bicolor Payenne Yield in Cape Verde
Source: MDPI journal article supplement (doi:10.3390/agriculture13010192), 2023-01-12
Supplement: s1 [file s1]

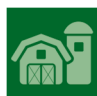

Table S1. Precipitation (Prc) and reference Evapotranspiration (ETo) averaged since 1982, driest and wettest year, average since 2007 (last 15 years) and daily ETo in both mentioned periods

| Month | Avg. (1982)            |      | Dry (1983)             |      | Wet (2015)             |      | Avg. (2007-2021)       |      | Daily Eto            |           |
|-------|------------------------|------|------------------------|------|------------------------|------|------------------------|------|----------------------|-----------|
|       | Prc.                   | ETo  | Prc.                   | ETo  | Prc.                   | ETo  | Prc.                   | ETo  | 1982/2021            | 2007-2021 |
|       | mm month <sup>-1</sup> |      | mm month <sup>-1</sup> |      | mm month <sup>-1</sup> |      | mm month <sup>-1</sup> |      | mm day <sup>-1</sup> |           |
| Jan   | 26                     | 103  | 4                      | 101  | 0                      | 101  | 3                      | 106  | 3.3                  | 3.4       |
| Feb   | 2                      | 107  | 0                      | 104  | 15                     | 95   | 3                      | 103  | 3.8                  | 3.7       |
| Mar   | 0                      | 126  | 1                      | 126  | 1                      | 125  | 2                      | 127  | 4.1                  | 4.1       |
| Apr   | 1                      | 128  | 0                      | 129  | 1                      | 126  | 2                      | 130  | 4.3                  | 4.3       |
| May   | 2                      | 134  | 1                      | 136  | 1                      | 139  | 1                      | 138  | 4.3                  | 4.4       |
| Jun   | 1                      | 131  | 1                      | 133  | 1                      | 132  | 2                      | 133  | 4.4                  | 4.4       |
| Jul   | 4                      | 132  | 3                      | 137  | 6                      | 134  | 11                     | 133  | 4.3                  | 4.3       |
| Aug   | 93                     | 125  | 38                     | 132  | 136                    | 125  | 70                     | 129  | 4.0                  | 4.2       |
| Sep   | 14                     | 123  | 15                     | 131  | 61                     | 117  | 93                     | 121  | 4.1                  | 4.0       |
| Oct   | 18                     | 120  | 12                     | 125  | 129                    | 111  | 37                     | 124  | 3.9                  | 4.0       |
| Nov   | 24                     | 106  | 1                      | 108  | 8                      | 106  | 6                      | 107  | 3.5                  | 3.6       |
| Dec   | 1                      | 105  | 1                      | 106  | 0                      | 102  | 7                      | 104  | 3.4                  | 3.4       |
|       | mm year <sup>-1</sup>  |      | mm year <sup>-1</sup>  |      | mm year <sup>-1</sup>  |      | mm year <sup>-1</sup>  |      | mm day <sup>-1</sup> |           |
| Total | 186                    | 1440 | 77                     | 1468 | 359                    | 1413 | 236                    | 1454 | 3.9                  | 4.0       |

| Month              | Prc. (mm month <sup>-1</sup> ) |      |      |      |      |      |      |      |      |      |      |      |      |      |      | Mean      |
|--------------------|--------------------------------|------|------|------|------|------|------|------|------|------|------|------|------|------|------|-----------|
|                    | 2021                           | 2020 | 2019 | 2018 | 2017 | 2016 | 2015 | 2014 | 2013 | 2012 | 2011 | 2010 | 2009 | 2008 | 2007 | 2007-2021 |
| Jan                | 2                              | 0    | 0    | 1    | 0    | 1    | 0    | 2    | 0    | 2    | 2    | 0    | 1    | 4    | 30   | 3         |
| Feb                | 0                              | 4    | 0    | 7    | 2    | 1    | 15   | 1    | 1    | 5    | 3    | 1    | 1    | 1    | 1    | 3         |
| Mar                | 1                              | 0    | 1    | 1    | 6    | 1    | 1    | 1    | 2    | 0    | 1    | 1    | 1    | 4    | 3    | 2         |
| Apr                | 1                              | 2    | 1    | 1    | 0    | 1    | 1    | 0    | 1    | 19   | 0    | 1    | 0    | 1    | 3    | 2         |
| May                | 1                              | 0    | 1    | 1    | 1    | 1    | 1    | 1    | 0    | 1    | 1    | 0    | 0    | 1    | 1    | 1         |
| Jun                | 2                              | 2    | 1    | 1    | 2    | 1    | 1    | 1    | 1    | 1    | 2    | 1    | 1    | 4    | 2    | 2         |
| Jul                | 6                              | 20   | 6    | 5    | 4    | 10   | 6    | 3    | 16   | 9    | 7    | 8    | 12   | 42   | 10   | 11        |
| Aug                | 110                            | 62   | 40   | 19   | 57   | 16   | 136  | 29   | 80   | 62   | 47   | 55   | 133  | 162  | 39   | 70        |
| Sep                | 28                             | 150  | 58   | 88   | 5    | 170  | 61   | 101  | 167  | 115  | 21   | 186  | 144  | 52   | 49   | 93        |
| Oct                | 15                             | 9    | 23   | 15   | 0    | 67   | 129  | 4    | 5    | 32   | 112  | 79   | 43   | 24   | 5    | 37        |
| Nov                | 4                              | 0    | 0    | 1    | 2    | 38   | 8    | 4    | 9    | 15   | 0    | 5    | 1    | 4    | 0    | 6         |
| Dec                | 13                             | 1    | 1    | 0    | 1    | 3    | 0    | 5    | 65   | 3    | 0    | 2    | 2    | 1    | 1    | 7         |
| Tot per year       | 183                            | 250  | 132  | 140  | 80   | 310  | 359  | 152  | 347  | 264  | 196  | 339  | 339  | 300  | 144  | 236       |
| Rain wet<br>period | 153                            | 221  | 121  | 122  | 62   | 253  | 326  | 134  | 252  | 209  | 180  | 320  | 320  | 238  | 93   | 200       |
| % wet/total        | 84                             | 88   | 92   | 87   | 78   | 82   | 91   | 88   | 73   | 79   | 92   | 94   | 94   | 79   | 65   | 84        |

| Month    | ETo (mm month <sup>-1</sup> ) |          |      |      |      |      |      |      |      |      |      |      |      |      |              | Mean      |
|----------|-------------------------------|----------|------|------|------|------|------|------|------|------|------|------|------|------|--------------|-----------|
|          | 2021                          | 2020     | 2019 | 2018 | 2017 | 2016 | 2015 | 2014 | 2013 | 2012 | 2011 | 2010 | 2009 | 2008 | 2007         | 2007-2021 |
| Jan      | 106                           | 109      | 101  | 109  | 104  | 108  | 101  | 104  | 109  | 102  | 113  | 105  | 107  | 105  | 106          | 106       |
| Feb      | 104                           | 104      | 103  | 96   | 105  | 105  | 95   | 108  | 102  | 101  | 112  | 103  | 101  | 103  | 104          | 103       |
| Mar      | 125                           | 130      | 132  | 127  | 123  | 123  | 125  | 124  | 127  | 129  | 129  | 135  | 123  | 126  | 131          | 127       |
| Apr      | 132                           | 134      | 128  | 126  | 133  | 129  | 126  | 131  | 128  | 122  | 130  | 135  | 128  | 133  | 129          | 130       |
| May      | 137                           | 139      | 135  | 130  | 138  | 132  | 139  | 137  | 145  | 140  | 135  | 142  | 136  | 139  | 140          | 138       |
| Jun      | 134                           | 136      | 133  | 130  | 133  | 133  | 132  | 134  | 131  | 134  | 130  | 135  | 132  | 133  | 132          | 133       |
| Jul      | 135                           | 135      | 134  | 131  | 138  | 131  | 134  | 133  | 131  | 133  | 136  | 136  | 135  | 128  | 128          | 133       |
| Aug      | 129                           | 130      | 130  | 132  | 131  | 132  | 125  | 127  | 128  | 128  | 130  | 130  | 124  | 124  | 131          | 129       |
| Sep      | 127                           | 118      | 119  | 119  | 136  | 112  | 117  | 122  | 114  | 116  | 132  | 115  | 116  | 125  | 124          | 121       |
| Oct      | 130                           | 126      | 126  | 122  | 135  | 119  | 111  | 124  | 124  | 121  | 122  | 117  | 124  | 124  | 129          | 124       |
| Nov      | 102                           | 110      | 111  | 111  | 107  | 98   | 106  | 110  | 106  | 106  | 110  | 105  | 112  | 107  | 111          | 107       |
| Dec      | 100                           | 101      | 104  | 105  | 112  | 103  | 102  | 102  | 101  | 112  | 110  | 105  | 100  | 103  | 103          | 104       |
| Tot year | 1461                          | 1472     | 1456 | 1438 | 1495 | 1425 | 1413 | 1456 | 1446 | 1444 | 1489 | 1463 | 1438 | 1450 | 1468         | 1454      |
|          |                               |          | Jan  | Feb  | Mar  | Apr  | May  | Jun  | Jul  | Aug  | Sep  | Oct  | Nov  | Dec  | Mean (year ) |           |
|          |                               | Mean ETo |      |      |      |      |      |      |      |      |      |      |      |      |              |           |
|          |                               | 2019     | 3.4  | 3.7  | 4.1  | 4.3  | 4.4  | 4.4  | 4.3  | 4.2  | 4.0  | 4.0  | 3.6  | 3.4  | 4.0          |           |
|          |                               | 2020     | 3.3  | 3.7  | 4.3  | 4.3  | 4.4  | 4.4  | 4.3  | 4.2  | 4.0  | 4.1  | 3.7  | 3.4  | 4.0          |           |
|          |                               | 2020     | 3.5  | 3.7  | 4.2  | 4.5  | 4.5  | 4.5  | 4.4  | 4.2  | 3.9  | 4.1  | 3.7  | 3.3  | 4.0          |           |

Table S3. Soil parameters comparison at the end of the experiment, between top soil (0-0.07 m) and deeper (0.07-0.2 m)

| TRAT     | prof | pH   | CE                 | MO   | Nt   | C/N  | Nitrate             | Polisen | K   | Ca                     | Mg   | Na   | B   | Cu   | Fe                  | Mn  | Zn   |
|----------|------|------|--------------------|------|------|------|---------------------|---------|-----|------------------------|------|------|-----|------|---------------------|-----|------|
| dec 2020 |      |      | dS m <sup>-1</sup> |      | %    |      | mg kg <sup>-1</sup> |         |     | meq 100g <sup>-1</sup> |      |      |     |      | mg kg <sup>-1</sup> |     |      |
| 1        | 1    | 8.42 | 3.93               | 3.11 | 0.27 | 7.56 | 4741,0              | 131     | 8.4 | 20.7                   | 11.5 | 11.1 | 2.3 | 1.09 | 4.6                 | 3.5 | 2.11 |
| 1        | 2    | 8.18 | 1.72               | 3.06 | 0.22 | 8.2  | 1750                | 173     | 6.3 | 22.9                   | 13.9 | 7.4  | 2.2 | 1.3  | 6.5                 | 3.2 | 2.54 |
| 2        | 1    | 8.38 | 1.25               | 3.02 | 0.21 | 8.5  | 1370                | 138     | 6.5 | 22.2                   | 13.3 | 7.6  | 1.9 | 1.03 | 5.7                 | 3.6 | 1.8  |
| 2        | 2    | 8.27 | 1.71               | 2.16 | 0.15 | 8.5  | 1540                | 77      | 4.7 | 20.7                   | 12.8 | 9.2  | 1.9 | 2.6  | 6                   | 2.8 | 3.14 |
| 3        | 1    | 8.53 | 1.11               | 2.4  | 0.14 | 9.7  | 603                 | 102     | 7.2 | 18.7                   | 12.4 | 7.9  | 1.8 | 1.02 | 4.9                 | 3.2 | 1.64 |
| 3        | 2    | 9.05 | 0.53               | 2.02 | 0.12 | 10.2 | 250                 | 62      | 5.6 | 18.2                   | 12.1 | 7.2  | 1.5 | 1.2  | 6.8                 | 2.9 | 1.9  |

1: top soil from 0- 0.07 m 2: from 0.07 to 0.2 m

Table S4. Nitrogen balance, made by comparing N uptake by green plants per harvest and N supplied by irrigation water along the different cultivated periods

| trat      | date       | Yield<br>kg ha <sup>-1</sup> | N in<br>leaves &<br>stems<br>% | N<br>exported<br>kg ha <sup>-1</sup> | Water<br>amount<br>m3 ha <sup>-1</sup> | N<br>contents<br>mgN L <sup>-1</sup> | N added<br>by water<br>kgN ha <sup>-1</sup> | Balance |
|-----------|------------|------------------------------|--------------------------------|--------------------------------------|----------------------------------------|--------------------------------------|---------------------------------------------|---------|
| RW<br>SDI | 07.08.2019 | 20796                        | 2,02                           | 419                                  | 3204                                   | 92,58                                | 297                                         | -123    |
|           | 08.29.2019 | 17320                        | 1,60                           | 277                                  | 2167                                   | 92,58                                | 201                                         | -76     |
|           | 12.17.2019 | 10691                        | 1,32                           | 141                                  | 4201                                   | 92,58                                | 389                                         | 248     |
|           | 02.03.2020 | 8275                         | 1,86                           | 154                                  | 1472                                   | 92,58                                | 136                                         | -18     |
|           | 03.25.2020 | 18799                        | 2,26                           | 425                                  | 1503                                   | 92,58                                | 139                                         | -286    |
|           | 05.20.2020 | 20937                        | 1,82                           | 381                                  | 2240                                   | 92,58                                | 207                                         | -174    |
|           | 07.09.2020 | 14992                        | 1,82                           | 273                                  | 2341                                   | 92,58                                | 217                                         | -57     |
|           | 09.03.2020 | 19438                        | 1,83                           | 355                                  | 2096                                   | 92,58                                | 194                                         | -161    |
|           | 11.06.2020 | 24419                        | 1,60                           | 391                                  | 2034                                   | 92,58                                | 188                                         | -202    |
|           | tot        | 17296                        |                                | 2817                                 | 21257                                  | 92,58                                | 1968                                        | -849    |
| RW DI     | 07.08.2019 | 9302                         | 2,01                           | 187                                  | 3204                                   | 92,58                                | 297                                         | 109     |
|           | 08.29.2019 | 9505                         | 1,65                           | 157                                  | 2167                                   | 92,58                                | 201                                         | 43      |
|           | 12.17.2019 | 18088                        | 1,34                           | 243                                  | 4201                                   | 92,58                                | 389                                         | 146     |
|           | 02.03.2020 | 5288                         | 1,75                           | 92                                   | 1472                                   | 92,58                                | 136                                         | 44      |
|           | 03.25.2020 | 13342                        | 1,88                           | 251                                  | 1503                                   | 92,58                                | 139                                         | -112    |
|           | 05.20.2020 | 11825                        | 1,53                           | 181                                  | 2240                                   | 92,58                                | 207                                         | 26      |
|           | 07.09.2020 | 10608                        | 1,74                           | 184                                  | 2341                                   | 92,58                                | 217                                         | 33      |
|           | 09.03.2020 | 13012                        | 1,94                           | 252                                  | 2096                                   | 92,58                                | 194                                         | -58     |
|           | 11.06.2020 | 21466                        | 1,36                           | 293                                  | 2034                                   | 92,58                                | 188                                         | -104    |
|           | tot        | 12493                        |                                | 1841                                 | 21257                                  | 92,58                                | 1968                                        | 127     |
| CW<br>SDI | 07.08.2019 | 12742                        | 1,81                           | 231                                  | 3204                                   | 10,16                                | 33                                          | -198    |
|           | 08.29.2019 | 10837                        | 1,37                           | 149                                  | 2167                                   | 10,16                                | 22                                          | -127    |
|           | 12.17.2019 | 22462                        | 1,10                           | 246                                  | 4201                                   | 10,16                                | 43                                          | -204    |
|           | 02.03.2020 | 6347                         | 1,48                           | 94                                   | 1472                                   | 10,16                                | 15                                          | -79     |
|           | 03.25.2020 | 13730                        | 1,78                           | 245                                  | 1503                                   | 10,16                                | 15                                          | -230    |
|           | 05.20.2020 | 15092                        | 1,71                           | 258                                  | 2240                                   | 10,16                                | 23                                          | -235    |
|           | 07.09.2020 | 15558                        | 1,85                           | 288                                  | 2341                                   | 10,16                                | 24                                          | -265    |
|           | 09.03.2020 | 18275                        | 2,00                           | 366                                  | 2096                                   | 10,16                                | 21                                          | -344    |
|           | 11.06.2020 | 22832                        | 1,44                           | 330                                  | 2034                                   | 10,16                                | 21                                          | -309    |
|           | tot        | 15320                        |                                | 2206                                 | 21257                                  | 10,16                                | 216                                         | -1990   |

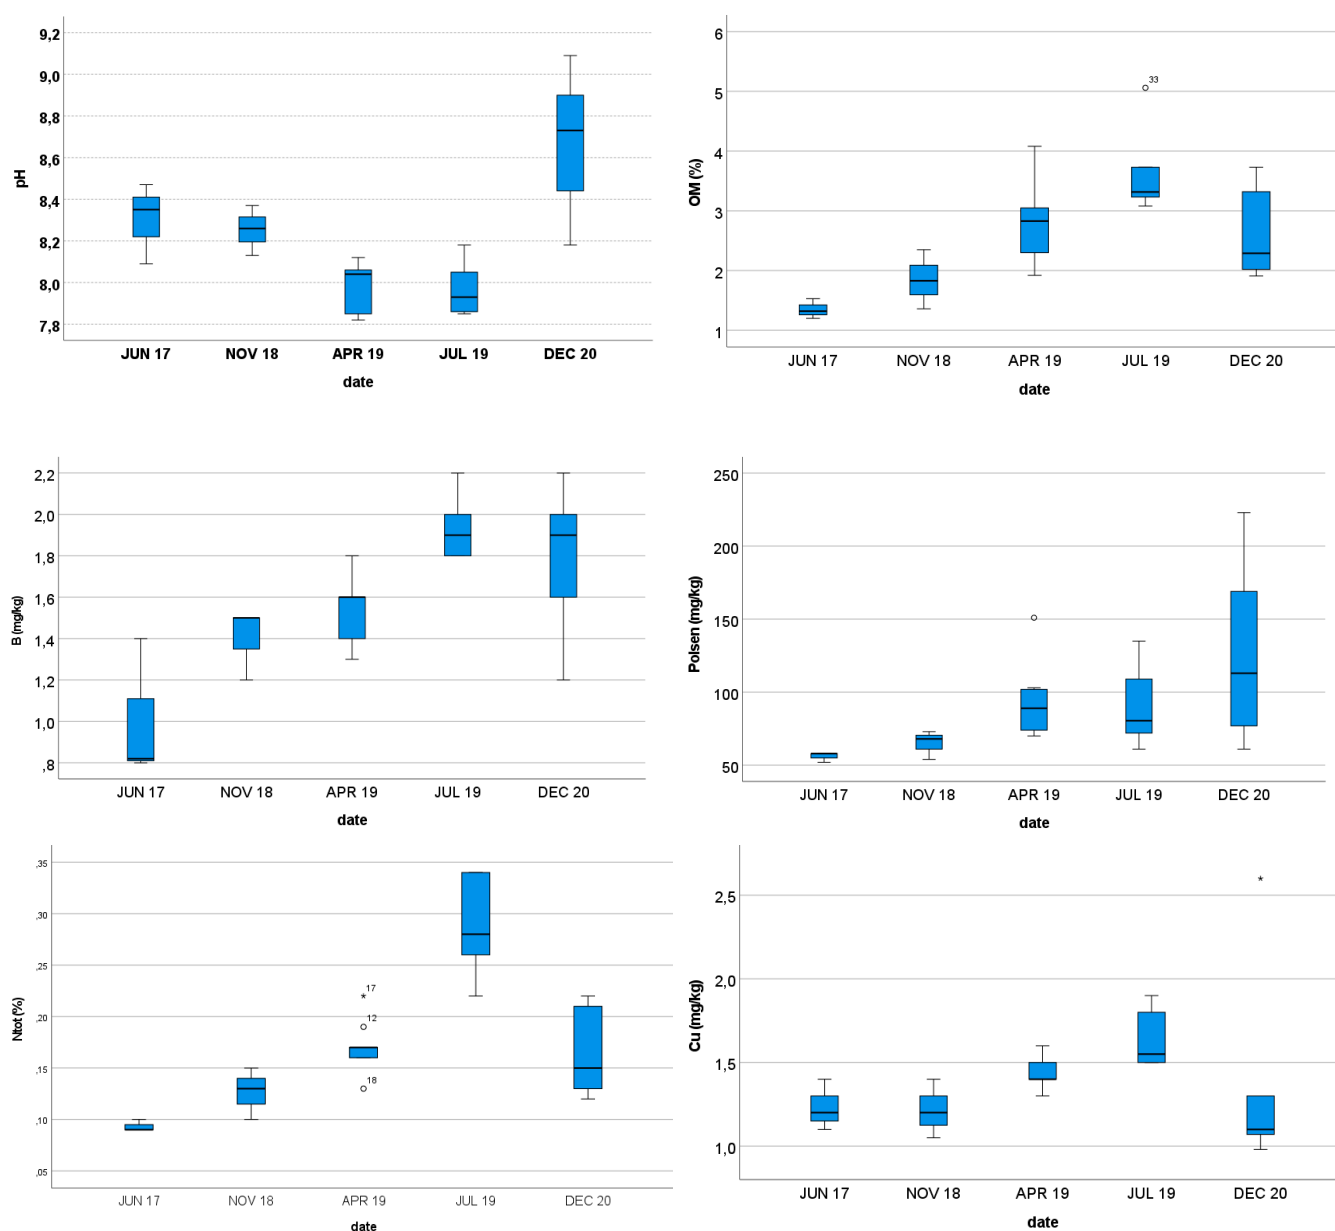

Figure S1. Soil parameters evolution trough time: pre (Jun 2017) and post manure use (Nov 2018), at seedling (April 2019), after the first harvest (Jul 2019) and one month after the last harvest (Dec 2020): pH, OM, B ( $\alpha$ : 0.05), P Olsen ( $\alpha$ : 0.1), and Ntot are significantly affected by time different at level 0.05, while Cu, is not significantly.

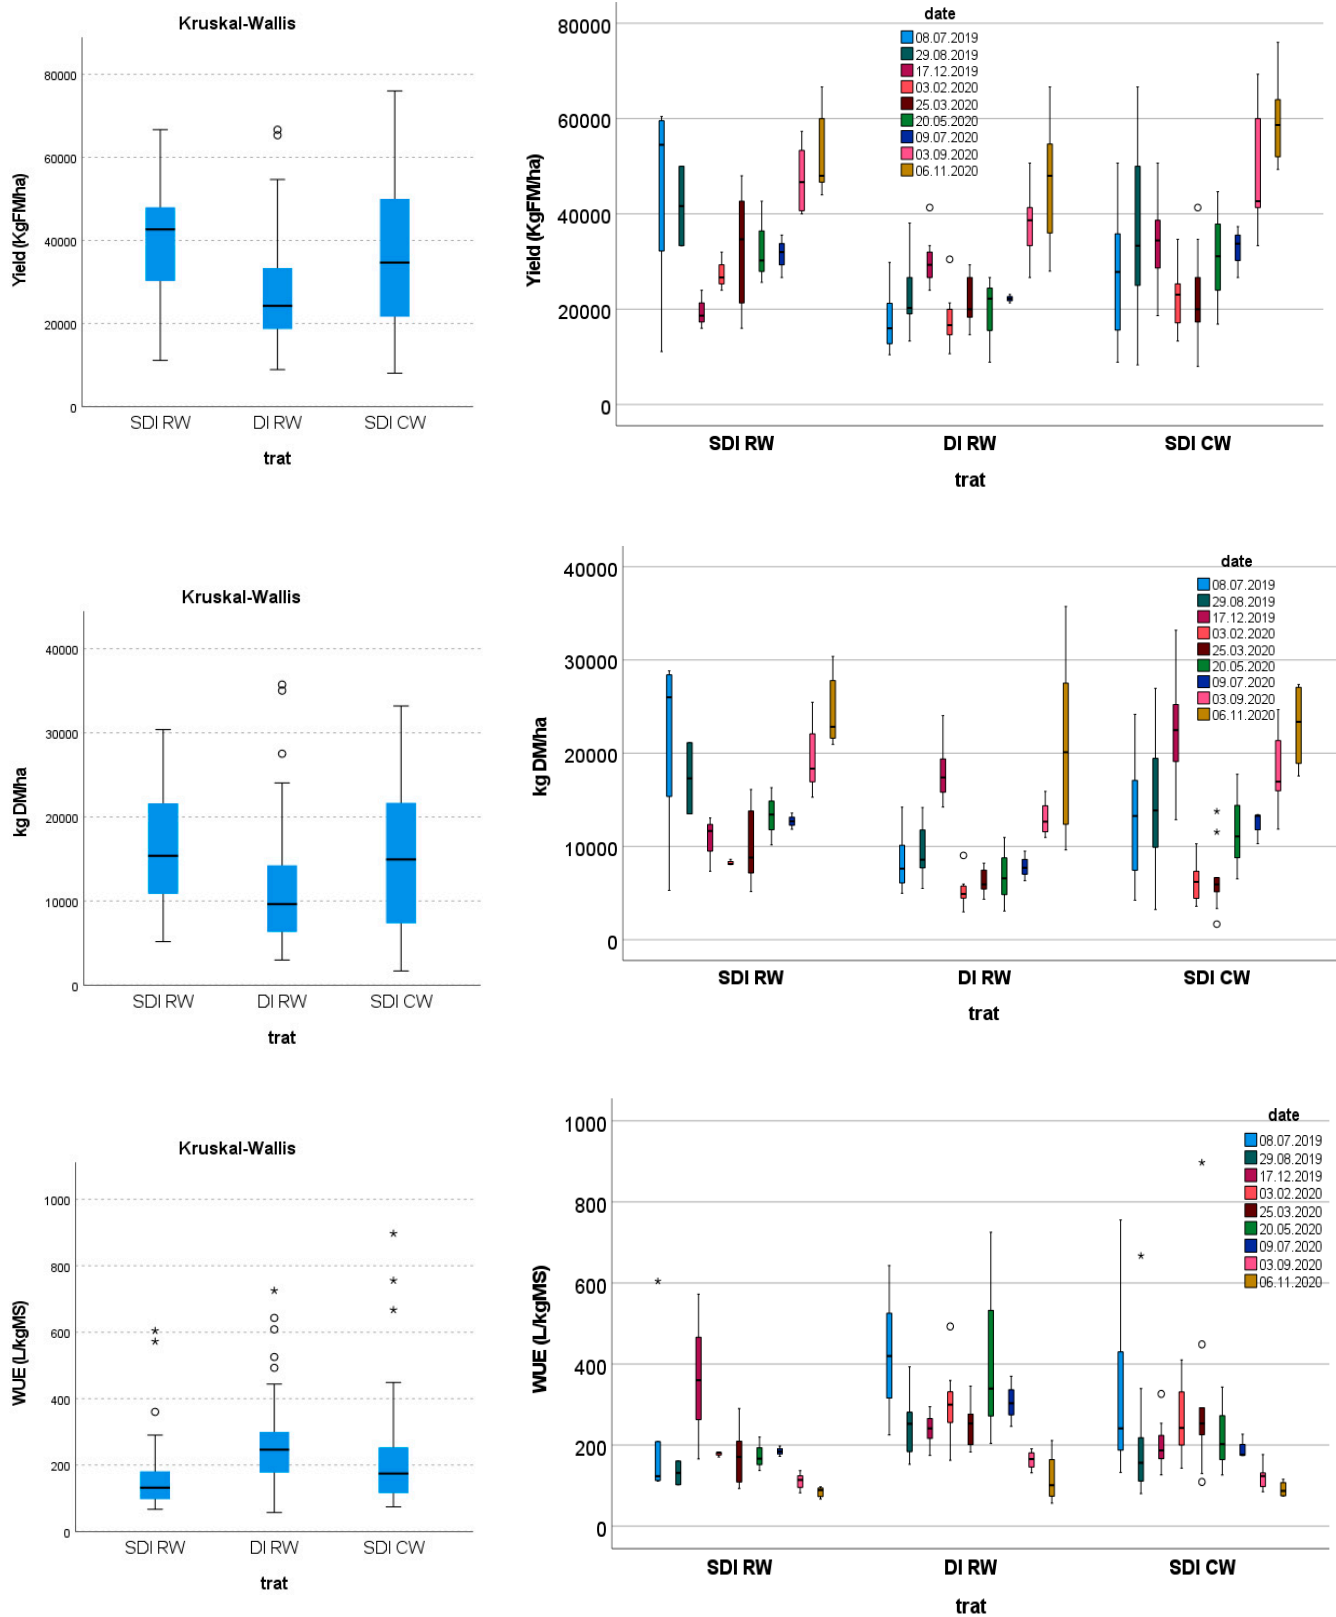

Figure S2. Yield (expressed as Fresh and Dry matter, kg ha<sup>-1</sup>) and WUE (L kg<sup>-1</sup> of DM) obtained by each treatment and over time.
